# Supplementary material for: On the Ability of Perfluorohexane Sulfonate (PFHxS) Bioaccumulation by Two Pseudomonas sp. Strains Isolated from PFAS-Contaminated Environmental Matrices
Source: PubMed Central journal article supplement (PMC7022908; doi:10.3390/microorganisms8010092), 2020-01-09
Supplement: microorganisms-08-00092-s001.pdf [file microorganisms-08-00092-s001.pdf]

*Supplementary information*

## **On the ability of perfluorohexane sulfonate (PFHxS) bioaccumulation by two *Pseudomonas* sp. strains isolated from PFAS-contaminated environmental matrices**

**Alessandro Presentato <sup>1</sup>, Silvia Lampis <sup>2,\*</sup>, Andrea Vantini <sup>3</sup>, Flavio Manea <sup>3</sup>, Francesca Daprà <sup>3</sup>, Stefano Zuccoli <sup>2</sup>, Giovanni Vallini <sup>2</sup>**

<sup>1</sup>Department of Biological, Chemical and Pharmaceutical Sciences and Technologies (STEBICEF) – University of Palermo, Italy; [alessandro.presentato@unipa.it](mailto:alessandro.presentato@unipa.it)

<sup>2</sup>Department of Biotechnology – University of Verona, Italy; [silvia.lampis@univr.it](mailto:silvia.lampis@univr.it); [stefano.zuccoli@studenti.univr.it](mailto:stefano.zuccoli@studenti.univr.it); [giovanni.vallini@univr.it](mailto:giovanni.vallini@univr.it)

<sup>3</sup>Regional Agency for Environmental Prevention and Protection of Veneto (ARPAV) – Regional Laboratories, Verona, Italy; [andrea.vantini@arpa.veneto.it](mailto:andrea.vantini@arpa.veneto.it); [flavio.manea@arpa.veneto.it](mailto:flavio.manea@arpa.veneto.it); [francesca.dapra@arpa.veneto.it](mailto:francesca.dapra@arpa.veneto.it)

\* Correspondence: [silvia.lampis@univr.it](mailto:silvia.lampis@univr.it)

**Table S1:** bacterial strains isolated from the microbial community inhabiting the soil contaminated by PFASs.

| Bacterial isolates | Identity (%) | Type reference strains                                     | Accession number        | Taxonomy            |
|--------------------|--------------|------------------------------------------------------------|-------------------------|---------------------|
| RS11               | 99           | <i>Pseudomonas delhiensis</i>                              | JGI.1118306             | Gammaproteobacteria |
| RS12               | 99           | <i>Pseudomonas veronii</i>                                 | JYLL01000074            | Gammaproteobacteria |
| RS15               | 99           | <i>Enterobacter ludwigii</i>                               | JTLO01000001            | Gammaproteobacteria |
| RS16               | 99           | <i>Pseudomonas veronii</i>                                 | JYLL01000074            | Gammaproteobacteria |
| RS17               | 98           | <i>Pseudomonas delhiensis</i>                              | JGI.1118306             | Gammaproteobacteria |
| RS18               | 99           | <i>Bordetella petrii</i>                                   | AM902716                | Betaproteobacteria  |
| RS21               | 99           | <i>Pseudomonas extremaustralis</i>                         | AHIP01000073            | Gammaproteobacteria |
| RS23               | 99           | <i>Pseudomonas aeruginosa</i>                              | BAMA01000316            | Gammaproteobacteria |
| RS25               | 99           | <i>Pseudomonas veronii</i>                                 | JYLL01000074            | Gammaproteobacteria |
| RS26               | 99           | <i>Starkeya novella</i>                                    | CP002026                | Alphaproteobacteria |
| RS31               | 98           | <i>Citrobacter farmeri</i>                                 | AF025371                | Gammaproteobacteria |
| RS33               | 99           | <i>Achromobacter dolens</i>                                | HF586509                | Betaproteobacteria  |
| RS34               | 99           | <i>Citrobacter farmeri</i>                                 | AF025371                | Gammaproteobacteria |
| RS36               | 99           | <i>Bordetella petrii</i>                                   | AM902716                | Betaproteobacteria  |
| RS37               | 99           | <i>Achromobacter insolitus</i>                             | CP019325                | Betaproteobacteria  |
| PS11               | 98           | <i>Pseudomonas nitrireducens</i>                           | HM246143                | Gammaproteobacteria |
| PS12               | 99           | <i>Pseudomonas simiae</i>                                  | AJ936933                | Gammaproteobacteria |
| PS13               | 99           | <i>Enterobacter ludwigii</i>                               | JTLO01000001            | Gammaproteobacteria |
| PS16               | 99           | <i>Starkeya novella</i>                                    | CP002026                | Alphaproteobacteria |
| PS17               | 99           | <i>Starkeya novella</i>                                    | CP002026                | Alphaproteobacteria |
| PS18               | 100          | <i>Pseudomonas delhiensis</i>                              | JGI.1118306             | Gammaproteobacteria |
| PS21               | 99           | <i>Pseudomonas veronii</i>                                 | JYLL01000074            | Gammaproteobacteria |
| PS23               | 99           | <i>Citrobacter farmeri</i>                                 | AF025371                | Gammaproteobacteria |
| PS25               | 98           | <i>Citrobacter farmeri</i>                                 | AF025371                | Gammaproteobacteria |
| PS27               | 99           | <i>Pseudomonas humi</i> ;<br><i>Pseudomonas delhiensis</i> | LC145037<br>JGI.1118306 | Gammaproteobacteria |
| PS28               | 99           | <i>Starkeya novella</i>                                    | CP002026                | Alphaproteobacteria |
| PS29               | 98           | <i>Starkeya novella</i>                                    | CP002026                | Alphaproteobacteria |
| PS33               | 99           | <i>Achromobacter insolitus</i>                             | CP019325                | Betaproteobacteria  |
| PS34               | 99           | <i>Pseudomonas delhiensis</i>                              | JGI.1118306             | Gammaproteobacteria |
| PS35               | 99           | <i>Pseudomonas veronii</i>                                 | JYLL01000074            | Gammaproteobacteria |
| PS38               | 99           | <i>Starkeya novella</i>                                    | CP002026                | Alphaproteobacteria |
| PS39               | 99           | <i>Starkeya novella</i>                                    | CP002026                | Alphaproteobacteria |
| WS11               | 99           | <i>Serratia proteamaculans</i>                             | AJ233434                | Gammaproteobacteria |
| WS12               | 99           | <i>Pseudomonas veronii</i>                                 | JYLL01000074            | Gammaproteobacteria |
| WS15               | 99           | <i>Pseudomonas simiae</i>                                  | AJ936933                | Gammaproteobacteria |
| WS16               | 99           | <i>Enterobacter ludwigii</i>                               | JTLO01000001            | Gammaproteobacteria |
| WS22               | 99           | <i>Enterobacter ludwigii</i>                               | JTLO01000001            | Gammaproteobacteria |
| WS25               | 94           | <i>Rhodanobacter rhizosphaerae</i>                         | FJ772032                | Gammaproteobacteria |
| WS31               | 99           | <i>Serratia liquefaciens</i>                               | CP006252                | Gammaproteobacteria |
| WS32               | 99           | <i>Enterobacter ludwigii</i>                               | JTLO01000001            | Gammaproteobacteria |

**Table S2:** bacterial strains isolated from the microbial community inhabiting the groundwater contaminated by PFASs.

| Bacterial isolates | Identity (%) | Type reference strains              | Accession number | Taxonomy            |
|--------------------|--------------|-------------------------------------|------------------|---------------------|
| RDM2               | 99           | <i>Comamonas thiooxydans</i>        | BBVD01000034;    | Betaproteobacteria  |
| RDM11              | 99           | <i>Variovorax bronnicumulans</i>    | AB300597         | Betaproteobacteria  |
| RDM14              | 99           | <i>Acidovorax soli</i>              | JGI.1085893      | Betaproteobacteria  |
| RDMF2              | 99           | <i>Aeromonas taiwansis</i>          | CDDD01000060     | Gammaproteobacteria |
| RDMF5              | 93           | <i>Pseudomonas marginalis</i>       | AJ308309         | Gammaproteobacteria |
| RDMF10             | 97           | <i>Pseudomonas granadiensis</i>     | LT629778         | Gammaproteobacteria |
| RDMF14             | 98           | <i>Albidiferax ferrireducens</i>    | CP000267         | Betaproteobacteria  |
| RDMF15             | 99           | <i>Pseudomonas gessardii</i>        | MNPU01000117     | Gammaproteobacteria |
| RDMYE2             | 99           | <i>Aeromonas caviae</i>             | CDBK01000019     | Gammaproteobacteria |
| RDMYE6             | 99           | <i>Aeromonas taiwansis</i>          | CDDD01000060     | Gammaproteobacteria |
| RDMYE7             | 97           | <i>Pseudomonas baetica</i>          | FM201274         | Gammaproteobacteria |
| RDMYE8             | 92           | <i>Aeromonas caviae</i>             | CDBK01000019     | Gammaproteobacteria |
| PDM1               | 99           | <i>Pseudomonas veronii</i>          | JYLL01000074     | Gammaproteobacteria |
| PDM2               | 98           | <i>Acinetobacter haemolyticus</i>   | APQQ01000002     | Gammaproteobacteria |
| PDM10              | 99           | <i>Variovorax boronicumulans</i>    | AB300597         | Betaproteobacteria  |
| PDM11              | 93           | <i>Flavobacterium tilapiae</i>      | HQ111525         | Flavobacteria       |
| PDMF1              | 99           | <i>Pseudomonas nitrireducens</i>    | HM246143         | Gammaproteobacteria |
| PDMF2              | 99           | <i>Citrobacter amalonaticus</i>     | FR870441         | Gammaproteobacteria |
| PDMF3              | 99           | <i>Pseudomonas donghuensis</i>      | AJJP01000212     | Gammaproteobacteria |
| PDMF7              | 99           | <i>Pseudomonas marginalis</i>       | AJ308309         | Gammaproteobacteria |
| PDMF9              | 99           | <i>Flavobacterium resistens</i>     | EF575563         | Flavobacteria       |
| PDMF10             | 98           | <i>Pseudomonas alcaligenes</i>      | BATI01000076     | Gammaproteobacteria |
| PDMF11             | 99           | <i>Pseudoxanthomonas japonensis</i> | AB008507         | Gammaproteobacteria |
| PDMYE1             | 99           | <i>Pseudomonas mosselii</i>         | AF072688         | Gammaproteobacteria |
| PDMYE5             | 99           | <i>Pseudomonas alkylphenolica</i>   | CP009048         | Gammaproteobacteria |
| PDMYE8             | 99           | <i>Aeromonas media</i>              | CDBZ01000012     | Gammaproteobacteria |
| WDM8               | 99           | <i>Pseudomonas veronii</i>          | JYLL01000074     | Gammaproteobacteria |
| WDMF2              | 99           | <i>Delftia acidovorans</i>          | JOUB01000005     | Betaproteobacteria  |
| WDMF6              | 99           | <i>Pseudomonas saponiphila</i>      | FNTJ01000001     | Gammaproteobacteria |
| WDMF7              | 99           | <i>Pseudomonas protegens</i>        | CP003190         | Gammaproteobacteria |
| WDMF8              | 99           | <i>Pseudomonas protegens</i>        | CP003190         | Gammaproteobacteria |
| WDMF10             | 99           | <i>Rhizobium oryzae</i>             | KX129901         | Alphaproteobacteria |
| WDMF11             | 99           | <i>Rhodanobacter thiooxydans</i>    | AJXW01000099     | Gammaproteobacteria |
| WDMF12             | 98           | <i>Shinella kummerowiae</i>         | EF070131         | Alphaproteobacteria |
| WDMYE1             | 98           | <i>Bacillus proteolyticus</i>       | MACH01000033     | Bacilli             |
| WDMYE3             | 99           | <i>Delftia lacustris</i>            | JGI.1102360      | Betaproteobacteria  |
| WDMYE4             | 98           | <i>Acinetobacter haemolyticus</i>   | APQQ01000002     | Gammaproteobacteria |
| WDMYE7             | 98           | <i>Aeromonas salmonicida</i>        | LSGW01000109     | Gammaproteobacteria |
| WDMYE8             | 94           | <i>Bacillus gaemokensis</i>         | LTAQ01000012     | Bacilli             |

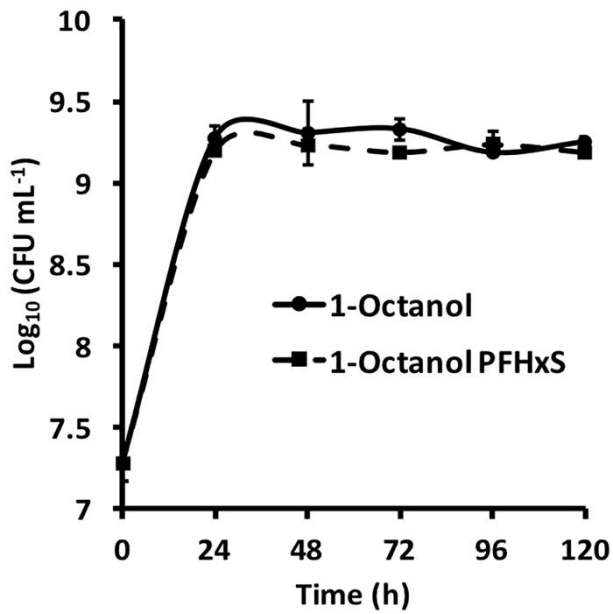

Figure S1: Growth profile of PS27 strain in the presence of either 1-octanol or in the co-presence of the organic solvent alongside PFHxS.

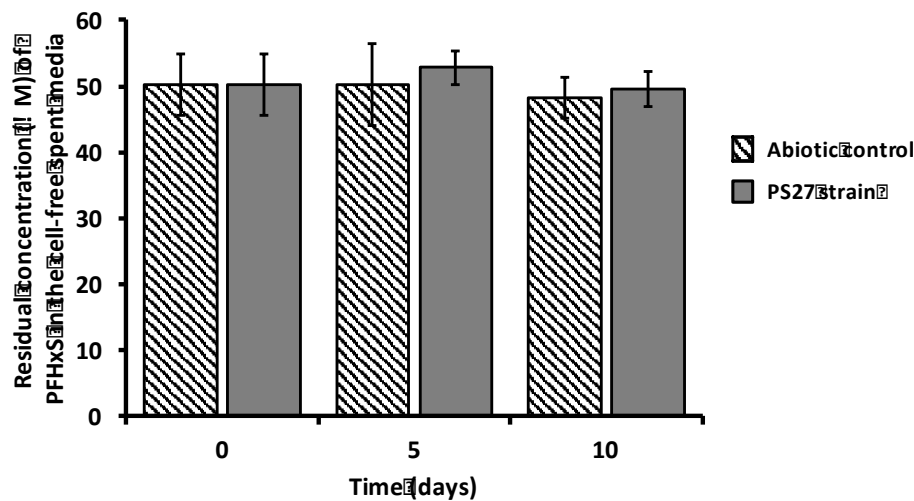

Figure S2: Removal efficacy of PFHxS performed by PS27 growing cells under 1-octanol conditioning.
